# Supplementary material
Source: Research Square preprint supplement (doi:10.21203/rs.3.rs-10262405/v1)
Supplement: Supplementary file 1 [file 7a477d28ad06169c7957988a.docx]

**Design and Computational Evaluation of Quinazolinone Hydrazine Schiff Base Derivatives as EGFR Inhibitors**

Prashant Singh1 and Ramendra K. Singh1*

1. *Bioorganic Research Laboratory, Department of Chemistry, University of Allahabad, Prayagraj- 211002, India*
2. *Department of Chemistry, C.M.P. Degree College, University of Allahabad, Prayagraj- 211002, India*
3. *Department of Chemistry, University of Allahabad, Prayagraj- 211002, India*

**Corresponding author: Ramendra K. Singh, Email Id:* [*singhramendrak@gmail.com*](mailto:singhramendrak@gmail.com)

**Si-Figures**

| 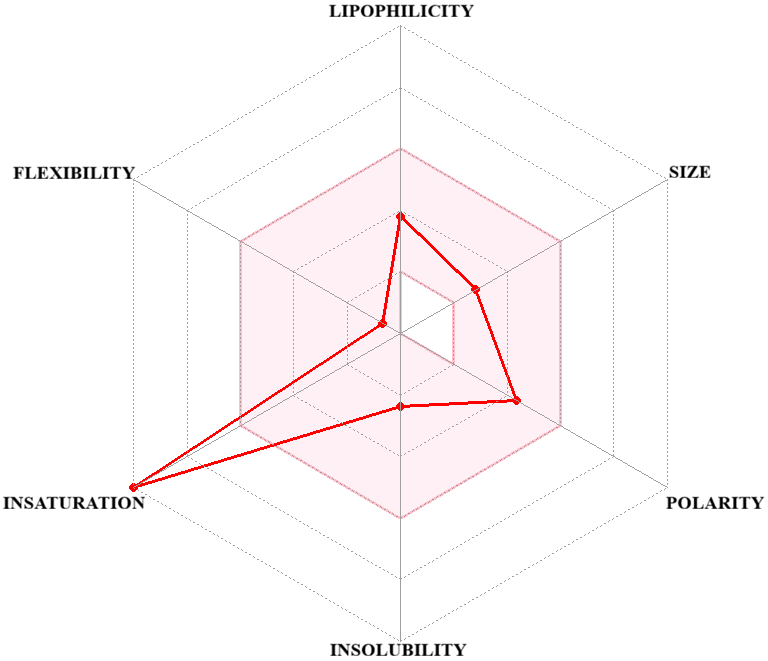  **Compound 1** | 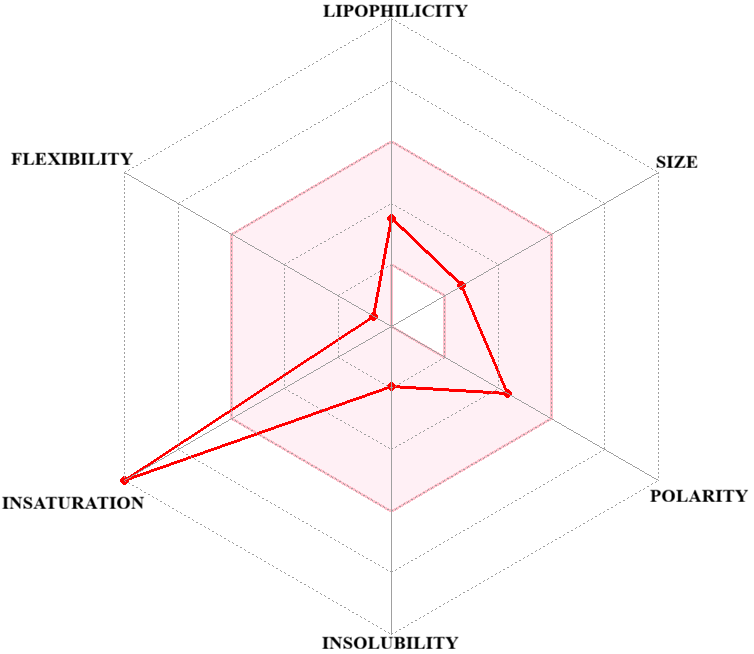  **Compound 2** |
| --- | --- |
| 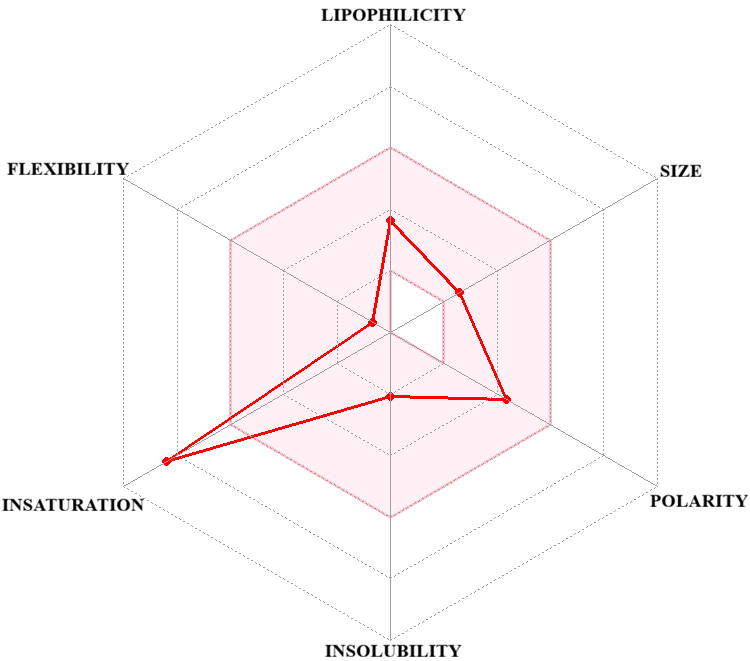  **Compound 3** | 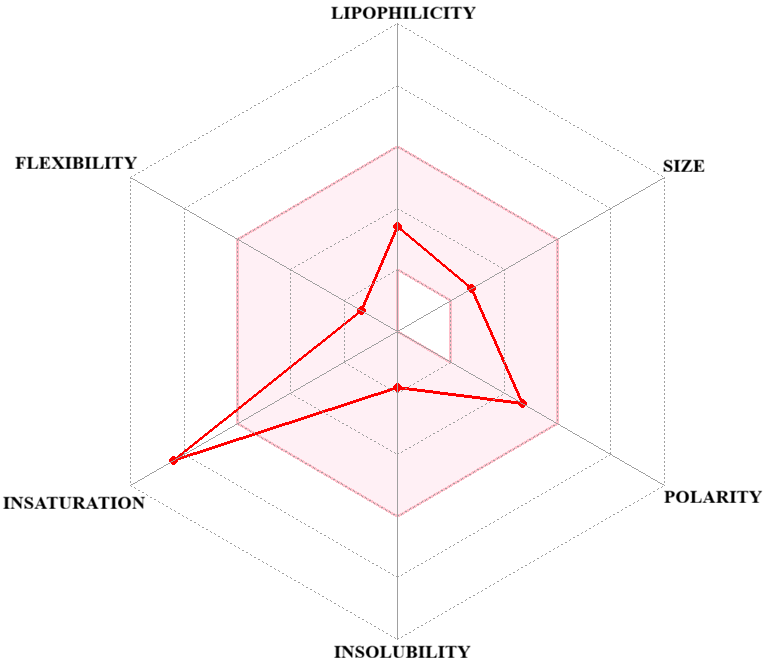  **Compound 4** |
| 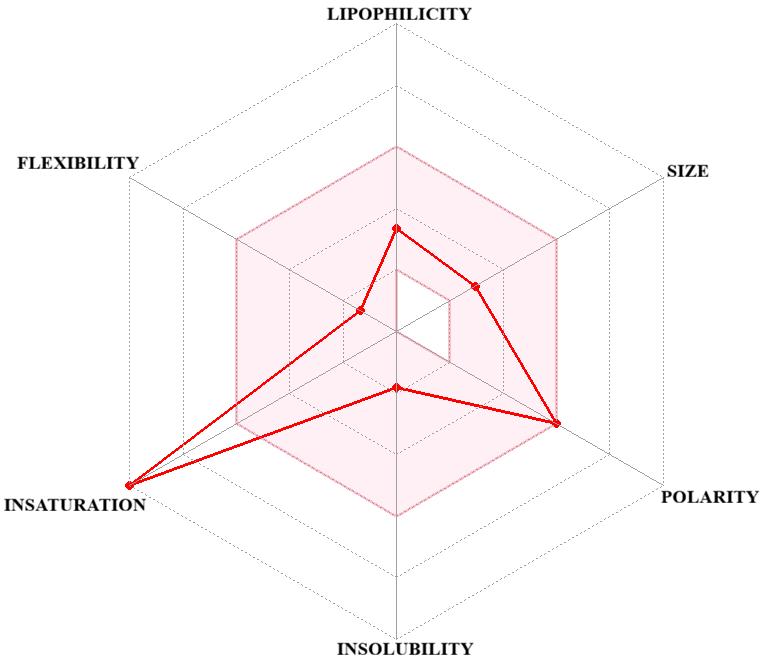  **Compound 5** | 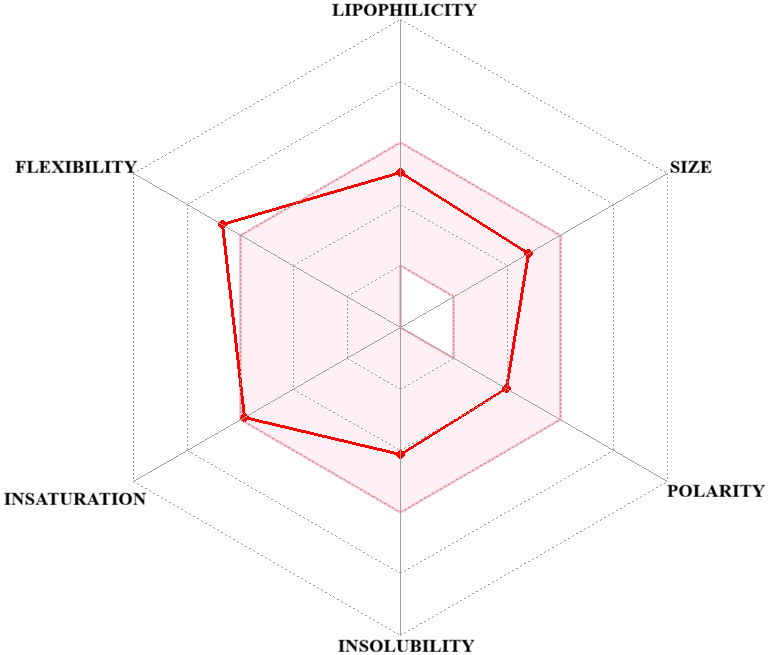  **Ref.** |

**Si-Figure 1.** Radar graph of compounds **1-5** and reference drug

(The pink region highlights the acceptable ranges of characteristics related to drug-likeness in compounds)
